# Supplementary material for: Antioxidants and Phenolic Acid Composition of Wholemeal and Refined-Flour, and Related Biscuits in Old and Modern Cultivars Belonging to Three Cereal Species
Source: MDPI journal article supplement (doi:10.3390/foods12132551), 2023-06-29
Supplement: s1 [file s1]

**Table S1.** Monthly total rainfall and temperature (minimum and maximum) at the experimental field of Foggia during the two growing seasons, 2016 and 2017

|              | <b>Rainfall (mm)</b> |              | <b>Min. temperature (°C)</b> |             | <b>Max. temperature (°C)</b> |             |
|--------------|----------------------|--------------|------------------------------|-------------|------------------------------|-------------|
|              | <b>2016</b>          | <b>2017</b>  | <b>2016</b>                  | <b>2017</b> | <b>2016</b>                  | <b>2017</b> |
| Nov          | 57                   | 38.4         | 6.8                          | 7.3         | 17.2                         | 17.1        |
| Dec          | 0.4                  | 3.1          | 3.3                          | 1.7         | 13.9                         | 13.1        |
| Jan          | 15.4                 | 81.8         | 3.3                          | 1.1         | 13.1                         | 8.2         |
| Feb          | 24.4                 | 23.2         | 4.5                          | 5.3         | 16.3                         | 14.8        |
| Mar          | 114.8                | 8.2          | 5.1                          | 5.2         | 14.6                         | 17.6        |
| Apr          | 32.2                 | 23.5         | 9.2                          | 5.5         | 21.5                         | 18.9        |
| May          | 72.9                 | 80           | 10.4                         | 10.5        | 23.2                         | 25.0        |
| Jun          | 58.4                 | 2.6          | 15.5                         | 17.1        | 28.9                         | 32.6        |
| <i>Mean</i>  |                      |              | <i>7.9</i>                   | <i>7.3</i>  | <i>18.9</i>                  | <i>18.7</i> |
| <i>Total</i> | <i>375.5</i>         | <i>260.8</i> |                              |             |                              |             |
