# Supplementary material for: Antioxidants and Phenolic Acid Composition of Wholemeal and Refined-Flour, and Related Biscuits in Old and Modern Cultivars Belonging to Three Cereal Species
Source: MDPI journal article supplement (doi:10.3390/foods12132551), 2023-06-29

Figure S1. Example of phenolic and flavonoid chromatogram during the whole cereal food supply chain

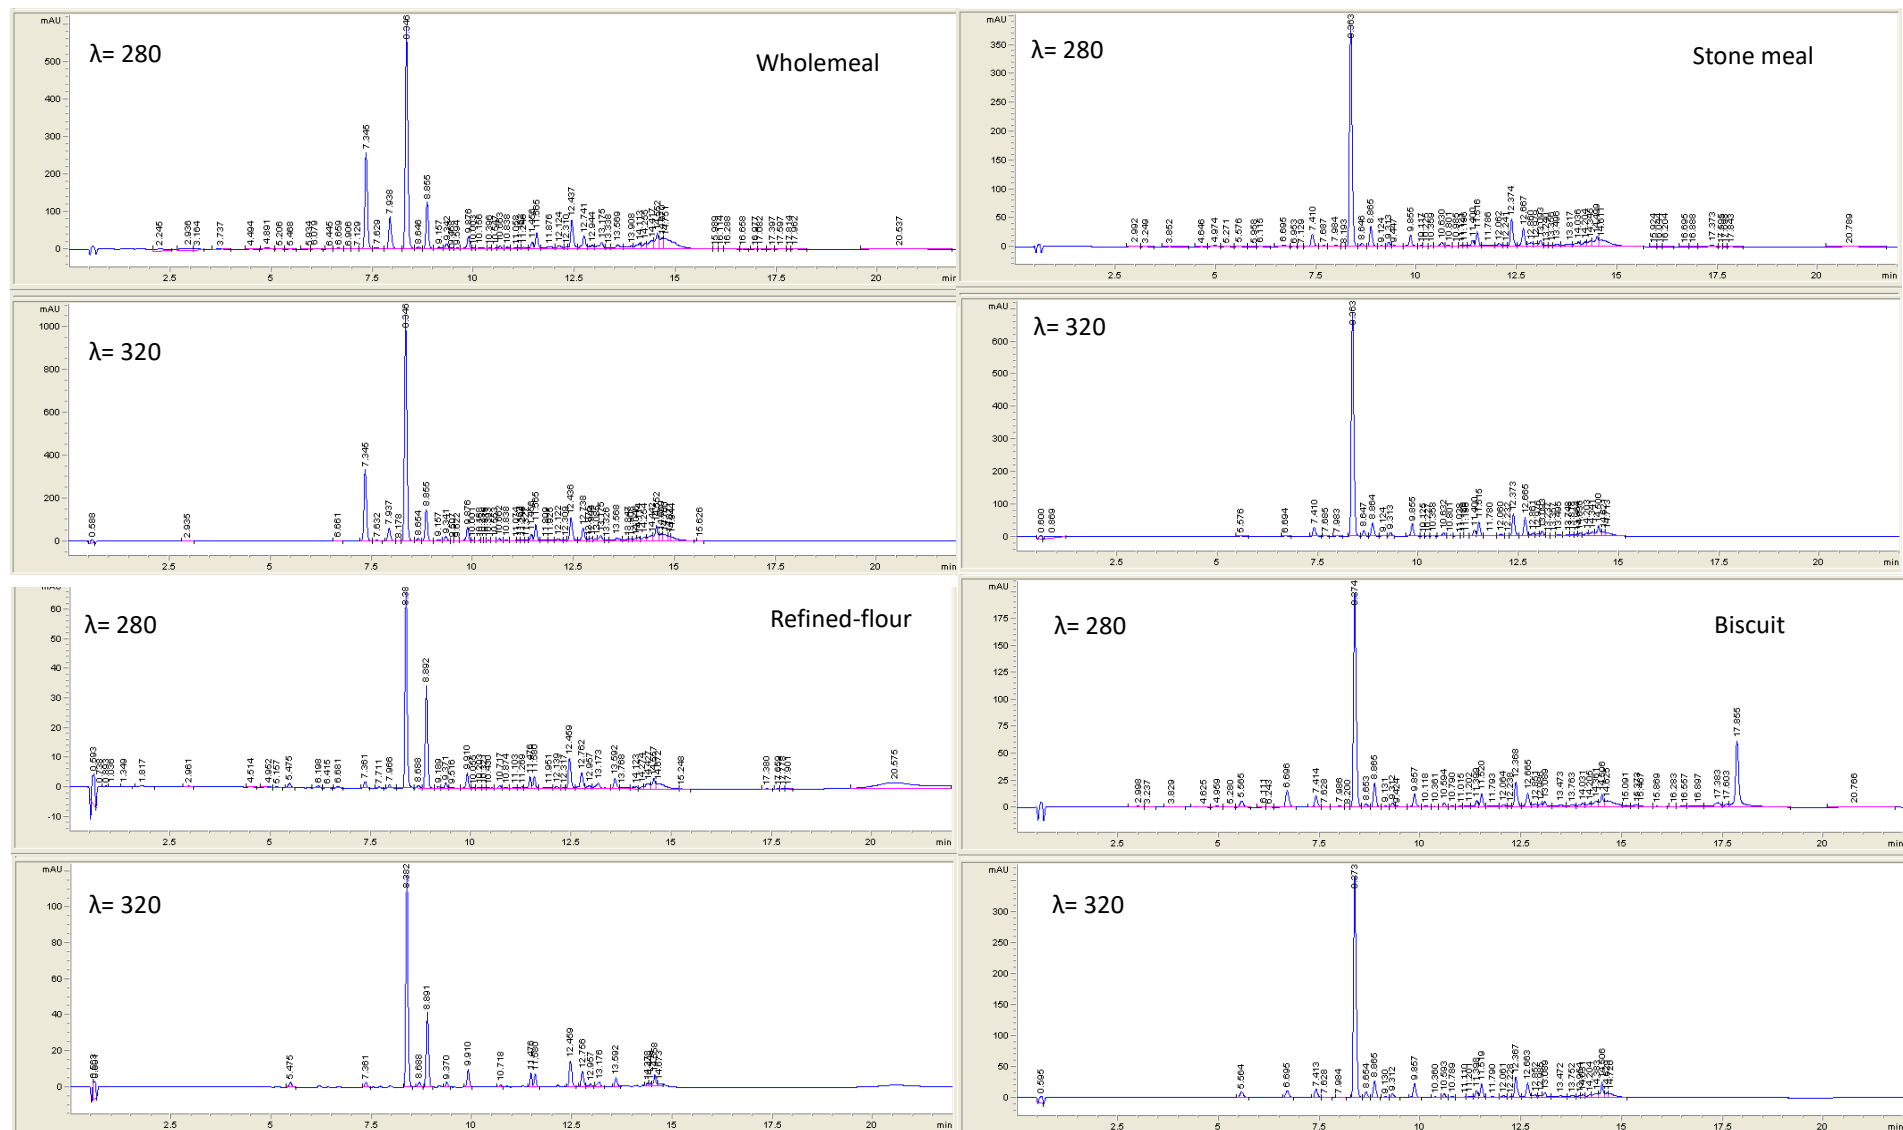

Supplement: s1 [file s1]
