# Supplementary material for: Antioxidants and Phenolic Acid Composition of Wholemeal and Refined-Flour, and Related Biscuits in Old and Modern Cultivars Belonging to Three Cereal Species
Source: MDPI journal article supplement (doi:10.3390/foods12132551), 2023-06-29
Supplement: s1 [file s1]

**Table S5.** Eigenvalue and percentage of variation explained by the first eleven factors for all traits analyzed.

|                          | Principal components |        |        |        |        |        |        |        |        |        |         |
|--------------------------|----------------------|--------|--------|--------|--------|--------|--------|--------|--------|--------|---------|
|                          | 1                    | 2      | 3      | 4      | 5      | 6      | 7      | 8      | 9      | 10     | 11      |
| Eigenvalues              | 10.667               | 4.433  | 3.060  | 2.242  | 1.269  | 0.983  | 0.564  | 0.434  | 0.207  | 0.093  | 0.050   |
| PC variation (%)         | 44.444               | 18.469 | 12.751 | 9.34   | 5.287  | 4.096  | 2.35   | 1.807  | 0.861  | 0.388  | 0.208   |
| Cumulative variation (%) | 44.444               | 62.913 | 75.664 | 85.004 | 90.291 | 94.387 | 96.737 | 98.544 | 99.405 | 99.793 | 100.001 |
| Trait                    | Unrotated factors    |        |        |        |        |        |        |        |        |        |         |
| PC                       | -0.446               | -0.411 | 0.205  | 0.622  | -0.334 | 0.049  | 0.013  | 0.282  | -0.085 | -0.053 | -0.012  |
| TW                       | -0.185               | 0.691  | 0.566  | 0.217  | -0.006 | 0.241  | 0.223  | -0.094 | -0.014 | 0.021  | -0.057  |
| TKW                      | -0.282               | 0.809  | 0.372  | 0.058  | -0.220 | 0.050  | 0.193  | -0.002 | 0.149  | -0.114 | 0.037   |
| TPC                      | 0.969                | -0.161 | 0.045  | 0.122  | -0.013 | 0.063  | -0.017 | 0.100  | -0.003 | -0.050 | -0.024  |
| TFC                      | 0.969                | -0.133 | 0.171  | 0.071  | -0.031 | 0.018  | 0.004  | 0.074  | -0.042 | -0.005 | 0.013   |
| TPAC                     | 0.926                | -0.098 | 0.297  | 0.088  | -0.142 | 0.070  | -0.007 | -0.079 | -0.020 | 0.078  | -0.009  |
| TYPC                     | -0.801               | 0.414  | 0.035  | -0.089 | 0.213  | -0.317 | 0.034  | 0.039  | -0.149 | 0.069  | -0.057  |
| DPPH                     | 0.964                | -0.137 | 0.183  | 0.102  | -0.057 | 0.060  | -0.001 | 0.011  | -0.029 | -0.023 | 0.008   |
| TEAC                     | 0.972                | -0.073 | 0.184  | 0.086  | -0.065 | 0.052  | 0.000  | -0.009 | -0.032 | 0.023  | -0.025  |
| Protocatechuic acid      | -0.648               | -0.316 | 0.364  | 0.264  | 0.276  | -0.090 | 0.427  | 0.071  | -0.077 | 0.023  | 0.015   |
| p -Hydroxybenzoic acid   | -0.220               | -0.519 | 0.400  | 0.278  | 0.539  | 0.373  | -0.023 | -0.060 | 0.093  | 0.031  | 0.033   |
| Vanillic acid            | 0.430                | 0.528  | -0.188 | -0.573 | -0.104 | 0.185  | 0.135  | 0.324  | -0.018 | -0.027 | 0.058   |
| Caffeic acid             | 0.821                | -0.102 | -0.303 | 0.123  | 0.347  | -0.143 | 0.092  | -0.189 | -0.018 | -0.148 | 0.046   |
| Syringic acid            | 0.785                | -0.245 | -0.208 | -0.239 | 0.371  | -0.095 | 0.256  | 0.075  | -0.052 | -0.043 | -0.012  |
| Vanillin                 | -0.060               | 0.598  | 0.227  | -0.245 | 0.543  | 0.309  | -0.313 | 0.193  | -0.025 | -0.015 | -0.021  |
| p-Coumaric acid          | 0.870                | -0.102 | -0.309 | -0.244 | 0.027  | -0.208 | 0.087  | 0.025  | 0.119  | 0.046  | -0.097  |

|                     |        |        |        |        |        |        |        |        |        |        |        |
|---------------------|--------|--------|--------|--------|--------|--------|--------|--------|--------|--------|--------|
| Syringaldeide       | 0.047  | 0.128  | -0.736 | 0.539  | 0.014  | 0.354  | 0.039  | -0.051 | 0.116  | -0.018 | -0.073 |
| Ferulic acid        | 0.662  | 0.524  | -0.253 | 0.402  | 0.025  | -0.013 | -0.073 | -0.119 | -0.152 | 0.086  | 0.105  |
| Sinapic acid        | -0.878 | -0.336 | -0.115 | -0.233 | -0.150 | -0.002 | -0.080 | -0.109 | 0.075  | -0.009 | 0.054  |
| trans-Cinnamic acid | 0.539  | 0.096  | 0.739  | -0.273 | 0.027  | -0.180 | 0.047  | -0.067 | 0.187  | 0.062  | 0.024  |
| cis-Cinnamic acid   | 0.152  | 0.616  | -0.615 | 0.364  | 0.086  | -0.044 | 0.146  | 0.145  | 0.132  | 0.122  | 0.047  |
| Narigenin           | -0.175 | -0.945 | -0.086 | -0.017 | 0.047  | 0.018  | 0.018  | 0.220  | 0.105  | 0.061  | 0.040  |
| Catechin            | 0.900  | -0.091 | 0.350  | 0.061  | -0.195 | 0.117  | -0.035 | 0.033  | -0.031 | 0.039  | -0.001 |
| Quercitin           | -0.188 | -0.319 | -0.297 | -0.606 | -0.179 | 0.529  | 0.239  | -0.159 | -0.107 | 0.049  | 0.001  |

---
