# Supplementary material for: Antioxidants and Phenolic Acid Composition of Wholemeal and Refined-Flour, and Related Biscuits in Old and Modern Cultivars Belonging to Three Cereal Species
Source: Foods. 2023 Jun 29;12(13):2551. doi: 10.3390/foods12132551 (PMC10340153; doi:10.3390/foods12132551)
Supplement: Supplementary file 1 [file foods-12-02551-s001.zip]

Archive with 7 entries (7 files):
- Figure S1_Borrelli et al_R1.pdf
- Supplementary Table S1_Borrelli et al_R1.pdf
- Supplementary Table S2_Borrelli et al_R1.xlsx
- Supplementary Table S3_Borrelli et al_R1.xlsx
- Supplementary Table S4_Borrelli et al_R1.xlsx
- Supplementary Table S5_Borrelli et al_R1.pdf
- Supplementary Table S6_Borrelli et al_R1.xlsx
