# Supplementary material for: Antioxidants and Phenolic Acid Composition of Wholemeal and Refined-Flour, and Related Biscuits in Old and Modern Cultivars Belonging to Three Cereal Species
Source: Foods. 2023 Jun 29;12(13):2551. doi: 10.3390/foods12132551 (PMC10340153; doi:10.3390/foods12132551)
Supplement: Supplementary file 1 [file foods-12-02551-s001.zip › Supplementary Table S2_Borrelli et al_R1.xlsx]

## Sheet: S2
Supplementary Table S2 Soluble free, soluble conjugated and insoluble bound phenolic acids in the wholemeal for the two genotype of three species analysed in two crop years. Values are means± standard deviation (SD) of three independent evaluation
		Triticum turgidum L. spp. dicoccum Shrank												T. turgidum ssp. durum												Hordeum vulgare
		MOLISANO (old)					PADRE PIO (modern)							CAPPELLI (old)					FORTORE (modern)							L94 (old)					PRIORA (modern)
		Concentration (µg/g, DW)					Concentration (µg/g, DW)							Concentration (µg/g, DW)					Concentration (µg/g, DW)							Concentration (µg/g, DW)					Concentration (µg/g, DW)
		2016		2017			2016		2017					2016		2017			2016		2017					2016		2017			2016		2017
		Mean value	SD	Mean value	SD		Mean value	SD	Mean value	SD				Mean value	SD	Mean value	SD		Mean value	SD	Mean value	SD				Mean value	SD	Mean value	SD		Mean value	SD	Mean value	SD
	Soluble free												Soluble free												Soluble free
PHENOLIC ACIDS	Protocatechuic acid	3.27	0.39	2.13	0.65		20.2	1.03	18.87	1.64		PHENOLIC ACIDS	Protocatechuic acid	n.d.	n.d.	n.d.	n.d.		n.d.	n.d.	n.d.	n.d.		PHENOLIC ACIDS	Protocatechuic acid	n.d.	n.d.	n.d.	n.d.		n.d.	n.d.	n.d.	n.d.
	p -Hydroxybenz acid	6.77	0.83	4.73	0.42		37.78	3.27	10.45	1.5			p -Hydroxybenz acid	n.d.	n.d.	n.d.	n.d.		n.d.	n.d.	n.d.	n.d.			p -Hydroxybenz acid	4.55	0.29	4.07	0.65		6.58	0.44	6.4	0.73
	Caffeic acid	n.d.	n.d.	0.47	0.019		0.42	0.01	0.4	0			Caffeic acid	n.d.	n.d.	n.d.	n.d.		n.d.	n.d.	n.d.	n.d.			Caffeic acid	n.d.	n.d.	n.d.	n.d.		n.d.	n.d.	n.d.	n.d.
	Syringic acid	n.d.	n.d.	n.d.	n.d.		n.d.	n.d.	n.d.	n.d.			Syringic acid	n.d.	n.d.	n.d.	n.d.		n.d.	n.d.	n.d.	n.d.			Syringic acid	5.15	0.38	4.9	0.37		2.1	0.09	2.17	0.04
	Vanillin	0.9	0.06	0.76	0.06		0.87	0.016	1.07	0.1			Vanillin	0.93	0.08	0.53	0.016		0.9	0.09	0.67	0.1			Vanillin	0.5	0.011	0.57	0.014		0.49	0.09	0.71	0.011
	p-Coumaric acid	n.d.	n.d.	n.d.	n.d.		0.27	0.01	0.3	0.011			p-Coumaric acid	0.25	0.05	0.47	0.016		0.43	0.08	0.4	0.01			p-Coumaric acid	2.73	0.37	6.3	0.3		1.74	0.08	1.56	0.19
	Syringaldeide	0.47	0.03	1.13	0.058		2.5	0.064	2.63	0.063			Syringaldeide	8.38	0.1	11.3	0.82		1.83	0.23	1.93	0.24			Syringaldeide	3.13	0.43	8.1	0.98		1.21	0.18	0.69	0.21
	Ferulic acid	6.67	0.16	5.47	0.78		4.83	0.3	3.87	0.02			Ferulic acid	2.64	0.23	2.38	0.34		1.35	0.18	0.93	0.1			Ferulic acid	2.33	0.41	5.27	0.16		2.21	0.18	2.72	0.33
	Sinapic acid	1.52	0.08	1.26	0.17		0.93	0.015	0.7	0.032			Sinapic acid	n.d.	n.d.	n.d.	n.d.		n.d.	n.d.	n.d.	n.d.			Sinapic acid	n.d.	n.d.	n.d.	n.d.		n.d.	n.d.	n.d.	n.d.
	trans-cinnamic acid	1.3	0.14	1.13	0.1		2.07	0.047	2.03	0.27			trans-cinnamic acid	2.35	0.79	1.23	0.15		7.33	0.27	7.53	0.16			trans-cinnamic acid	0.5	0.09	3.03	0.12		0.31	0.01	1.53	0.21
	cis-cinnamic acid	2.27	0.16	2.03	0.45		2.87	0.77	3	0.36			cis-cinnamic acid	5.55	0.94	4.67	0.22		1.16	0.43	2.65	0.6			cis-cinnamic acid	0.3	0.17	10.8	1.15		0.25	0.017	n.d.	n.d.
	Vanillic acid	n.d.	n.d.	n.d.	n.d.		n.d.	n.d.	n.d.	n.d.			Vanillic acid	n.d.	n.d.	n.d.	n.d.		n.d.	n.d.	n.d.	n.d.			Vanillic acid	n.d.	n.d.	n.d.	n.d.		n.d.	n.d.	n.d.	n.d.
	Sum Soluble free	23.17		19.11			72.74		43.32				Sum Soluble free	20.1		20.58			13		14.11				Sum Soluble free	19.19		43.04			14.89		15.78
FLAVONOIDS	Catechin	n.d.	n.d.	n.d.	n.d.		n.d.	n.d.	n.d.	n.d.		FLAVONOIDS	Catechin	n.d.	n.d.	n.d.	n.d.		n.d.	n.d.	n.d.	n.d.		FLAVONOIDS	Catechin	18.41	0.95	23.93	1.6		52.36	2.05	52.85	2.29
	Quercetin	2.37	0.59	1.93	0.24		n.d.	n.d.	n.d.	n.d.			Quercetin	n.d.	n.d.	n.d.	n.d.		n.d.	n.d.	n.d.	n.d.			Quercetin	n.d.	n.d.	n.d.	n.d.		n.d.	n.d.	n.d.	n.d.
	Narigenin	3	0.22	3.63	0.71		2.47	0.27	2.37	0.61			Narigenin	n.d.	n.d.	n.d.	n.d.		n.d.	n.d.	n.d.	n.d.			Narigenin	0.48	0.08	1.87	0.1		0.4	0.01	1.03	0.08
	Sum Soluble free	5.37		5.56			2.47		2.37				Sum Soluble free	0		0			0		0				Sum Soluble free	18.89		25.8			52.76		53.88
		Triticum turgidum L. spp. dicoccum Shrank												T. turgidum ssp. durum												Hordeum vulgare
		MOLISANO (old)					PADRE PIO (modern)							CAPPELLI (old)					FORTORE (modern)							L94 (old)					PRIORA (modern)
		Concentration (µg/g, DW)					Concentration (µg/g, DW)							Concentration (µg/g, DW)					Concentration (µg/g, DW)							Concentration (µg/g, DW)					Concentration (µg/g, DW)
		2016		2017			2016		2017					2016		2017			2016		2017					2016		2017			2016		2017
		Mean value	SD	Mean value	SD		Mean value	SD	Mean value	SD				Mean value	SD	Mean value	SD		Mean value	SD	Mean value	SD				Mean value	SD	Mean value	SD		Mean value	SD	Mean value	SD
	Soluble conjugated												Soluble conjugated												Soluble conjugated
PHENOLIC ACIDS	Protocatechuic acid	3.77	0.69	3.31	0.92		4.51	0.38	10.44	0.52		PHENOLIC ACIDS	Protocatechuic acid	4.16	0.74	4.16	0.46		7.08	0.62	11.09	1.63		PHENOLIC ACIDS	Protocatechuic acid	n.d.	n.d.	n.d.	n.d.		n.d.	n.d.	n.d.	n.d.
	p -Hydroxybenz acid	1.83	0.08	1.54	0.13		1.87	0.24	1.14	0.23			p -Hydroxybenz acid	n.d.	n.d.	n.d.	n.d.		n.d.	n.d.	n.d.	n.d.			p -Hydroxybenz acid	n.d.	n.d.	n.d.	n.d.		n.d.	n.d.	n.d.	n.d.
	Caffeic acid	n.d.	n.d.	n.d.	n.d.		n.d.	n.d.	n.d.	n.d.			Caffeic acid	n.d.	n.d.	n.d.	n.d.		n.d.	n.d.	n.d.	n.d.			Caffeic acid	n.d.	n.d.	n.d.	n.d.		n.d.	n.d.	n.d.	n.d.
	Syringic acid	5.33	0.11	1.81	0.17		2.25	0.23	1.49	0.39			Syringic acid	n.d.	n.d.	n.d.	n.d.		2.4	0.34	2.72	0.34			Syringic acid	2.45	0.58	2.97	0.96		2.32	0.61	1.84	0.14
	Vanillin	1.23	0.08	1.19	0.22		1.97	0.31	1.03	0.2			Vanillin	1.12	0.13	1.44	0.27		1.55	0.43	1.81	0.39			Vanillin	1.17	0.33	1.18	0.29		1.28	0.17	1.67	0.21
	p-Coumaric acid	0.92	0.01	1.21	0.2		1.45	0.17	0.73	0.013			p-Coumaric acid	0.65	0.05	1.23	0.24		1.01	0.13	1.44	0.34			p-Coumaric acid	2.38	0.18	1.55	0.13		1.84	0.67	1.55	0.24
	Syringaldeide	4.05	0.69	2.19	0.84		3.85	0.69	3.33	0.16			Syringaldeide	1.89	0.13	n.d.	n.d.		n.d.	n.d.	n.d.	n.d.			Syringaldeide	3.58	0.73	n.d.	n.d.		2.08	0.32	n.d.	n.d.
	Ferulic acid	8.93	0.54	7.52	0.12		10.35	1.05	6.89	0.43			Ferulic acid	7.79	0.75	8.96	0.7		11.05	1.78	9.91	1.5			Ferulic acid	9.92	0.91	16.75	0.48		12.68	1.12	12.37	1.24
	Sinapic acid	n.d.	n.d.	n.d.	n.d.		n.d.	n.d.	n.d.	n.d.			Sinapic acid	n.d.	n.d.	n.d.	n.d.		n.d.	n.d.	n.d.	n.d.			Sinapic acid	n.d.	n.d.	n.d.	n.d.		n.d.	n.d.	n.d.	n.d.
	trans-cinnamic acid	5.97	0.1	10.29	1.76		24.17	2.39	15.04	1.9			trans-cinnamic acid	8.6	0.96	6.05	0.36		2.72	0.25	6.93	0.74			trans-cinnamic acid	5.55	0.34	4.79	0.27		5.37	0.29	5.17	0.24
	cis-cinnamic acid	n.d.	n.d.	n.d.	n.d.		n.d.	n.d.	n.d.	n.d.			cis-cinnamic acid	n.d.	n.d.	n.d.	n.d.		n.d.	n.d.	n.d.	n.d.			cis-cinnamic acid	n.d.	n.d.	n.d.	n.d.		n.d.	n.d.	n.d.	n.d.
	Vanillic acid	4.14	0.64	2.38	0.15		1.83	0.39	1.99	0.5			Vanillic acid	2.63	0.33	2.88	0.19		3.25	0.15	4.21	0.79			Vanillic acid	2.22	0.15	2.82	0.21		2.16	0.26	2.86	0.36
	Sum Soluble conjugated	36.17		31.44			52.25		42.08				Sum Soluble conjugated	26.84		24.72			29.06		38.11				Sum Soluble conjugated	27.27		30.06			27.73		25.46
FLAVONOIDS	Catechin	n.d.	n.d.	n.d.	n.d.		n.d.	n.d.	n.d.	n.d.		FLAVONOIDS	Catechin	n.d.	n.d.	n.d.	n.d.		n.d.	n.d.	n.d.	n.d.		FLAVONOIDS	Catechin	n.d.	n.d.	n.d.	n.d.		n.d.	n.d.	n.d.	n.d.
	Quercetin	n.d.	n.d.	n.d.	n.d.		n.d.	n.d.	n.d.	n.d.			Quercetin	n.d.	n.d.	n.d.	n.d.		n.d.	n.d.	n.d.	n.d.			Quercetin	n.d.	n.d.	n.d.	n.d.		n.d.	n.d.	n.d.	n.d.
	Narigenin	0.44	0.011	0.59	0.07		n.d.	n.d.	n.d.	n.d.			Narigenin	n.d.	n.d.	n.d.	n.d.		n.d.	n.d.	n.d.	n.d.			Narigenin	0.55	0.018	0.51	0.04		n.d.	n.d.	n.d.	n.d.
	Sum Soluble conjugated	0.44		0.59			0		0				Sum Soluble conjugated	0		0			0		0				Sum Soluble conjugated	0.55		0.51			0		0
		Triticum turgidum L. spp. dicoccum Shrank												T. turgidum ssp. durum												Hordeum vulgare
		MOLISANO (old)					PADRE PIO (modern)							CAPPELLI (old)					FORTORE (modern)							L94 (old)					PRIORA (modern)
		Concentration (µg/g, DW)					Concentration (µg/g, DW)							Concentration (µg/g, DW)					Concentration (µg/g, DW)							Concentration (µg/g, DW)					Concentration (µg/g, DW)
		2016		2017			2016		2017					2016		2017			2016		2017					2016		2017			2016		2017
		Mean value	SD	Mean value	SD		Mean value	SD	Mean value	SD				Mean value	SD	Mean value	SD		Mean value	SD	Mean value	SD				Mean value	SD	Mean value	SD		Mean value	SD	Mean value	SD
	Insoluble bound												Insoluble bound												Insoluble bound
PHENOLIC ACIDS	Protocatechuic acid	n.d.	n.d.	n.d.	n.d.		0.59	0.019	1.28	0.27		PHENOLIC ACIDS	Protocatechuic acid	n.d.	n.d.	n.d.	n.d.		n.d.	n.d.	n.d.	n.d.		PHENOLIC ACIDS	Protocatechuic acid	1.37	0.38	1.44	0.33		1.24	0.12	1.31	0.14
	p -Hydroxybenz acid	n.d.	n.d.	n.d.	n.d.		0.34	0.1	0.36	0.1			p -Hydroxybenz acid	1.3	0.22	1.23	0.06		n.d.	n.d.	n.d.	n.d.			p -Hydroxybenz acid	2.47	0.11	0.97	0.12		1.52	0.15	0.83	0.04
	Caffeic acid	n.d.	n.d.	n.d.	n.d.		0.41	0.05	n.d.	n.d.			Caffeic acid	0.99	0.24	0.78	0.09		0.74	0.023	1.07	0.22			Caffeic acid	33.12	5.88	19.15	1.66		15.63	0.53	5.92	0.56
	Syringic acid	n.d.	n.d.	0.9	0.11		1.02	0.11	2.25	0.4			Syringic acid	1.69	0.25	1.52	0.04		1.51	0.22	1.76	0.2			Syringic acid	1.93	0.14	1.22	0.32		1.38	0.05	1.7	0.36
	Vanillin	1.09	0.07	0.85	0.08		1.29	0.29	1.43	0.4			Vanillin	1.61	0.14	1.56	0.37		1.68	0.23	1.4	0.26			Vanillin	1.65	0.16	1.75	0.23		1.19	0.23	1.35	0.18
	p-Coumaric acid	11.2	0.93	10.56	0.75		4.03	0.93	6.69	3.5			p-Coumaric acid	7.6	0.14	7.33	0.22		8.88	0.87	10.53	1.4			p-Coumaric acid	12.77	2.57	11.68	2.92		12.56	1.7	10.35	0.76
	Syringaldeide	2.77	0.92	2.05	0.21		n.d.	n.d.	n.d.	n.d.			Syringaldeide	1.62	0.21	0.75	0.013		0.84	0.09	0.72	0.06			Syringaldeide	2.67	0.63	2.39	0.56		2.56	0.32	2.11	0.12
	Ferulic acid	135.68	16.99	160.91	16.42		169.01	33.39	192.43	61.9			Ferulic acid	377.63	54.5	308.19	13.16		287.55	34.38	201.84	10.61			Ferulic acid	377.23	61.94	327.55	25.4		360.41	20.89	272.59	24.48
	Sinapic acid	73.17	3.24	75.13	3.17		58.28	3.06	60.02	2.28			Sinapic acid	48.91	1.87	50.33	2.18		50.49	1.09	51.32	1.39			Sinapic acid	29.97	3.59	26.07	3.47		27	0.78	28.07	0.49
	trans-cinnamic acid	5.71	0.43	7.79	0.6		n.d.	n.d.	n.d.	n.d.			trans-cinnamic acid	n.d.	n.d.	n.d.	n.d.		17.44	2.47	30.85	1.91			trans-cinnamic acid	17.56	2.87	14.91	1.48		44.34	6.08	39.57	4.99
	cis-cinnamic acid	7.55	0.92	7.89	0.6		6.55	0.17	10.64	0.79			cis-cinnamic acid	22.37	1.97	16.59	1.43		13.63	2.5	14.13	1.83			cis-cinnamic acid	19.09	8.38	14.37	0.51		12.88	1.94	8.91	0.67
	Vanillic acid	0.89	0.013	0.9	0.06		1.16	0.16	1.2	0.24			Vanillic acid	2.15	0.055	1.25	0.016		1.49	0.22	1.04	0.1			Vanillic acid	2.21	0.23	2.37	0.15		1.85	0.06	2.45	0.18
	Sum Insoluble bound	238.06		266.98			242.68		276.3				Sum Insoluble bound	465.87		389.53			384.25		314.66				Sum Insoluble bound	502.04		423.87			482.56		375.16
FLAVONOIDS	Catechin	n.d.	n.d.	n.d.	n.d.		n.d.	n.d.	n.d.	n.d.		FLAVONOIDS	Catechin	n.d.	n.d.	n.d.	n.d.		n.d.	n.d.	n.d.	n.d.		FLAVONOIDS	Catechin	4.82	0.95	4.11	0.37		4.79	0.45	5.06	0.49
	Quercetin	n.d.	n.d.	n.d.	n.d.		n.d.	n.d.	n.d.	n.d.			Quercetin	n.d.	n.d.	n.d.	n.d.		n.d.	n.d.	n.d.	n.d.			Quercetin	n.d.	n.d.	n.d.	n.d.		n.d.	n.d.	n.d.	n.d.
	Narigenin	n.d.	n.d.	n.d.	n.d.		0.74	0.03	1.12	0.27			Narigenin	n.d.	n.d.	n.d.	n.d.		n.d.	n.d.	n.d.	n.d.			Narigenin	0.37	0.021	0.38	0.021		0.38	0.05	0.59	0.03
	Sum Insoluble bound	0		0			0.74		1.12				Sum Insoluble bound	0		0			0		0				Sum Insoluble bound	5.19		4.49			5.17		5.65
