# Supplementary material for: Antioxidants and Phenolic Acid Composition of Wholemeal and Refined-Flour, and Related Biscuits in Old and Modern Cultivars Belonging to Three Cereal Species
Source: Foods. 2023 Jun 29;12(13):2551. doi: 10.3390/foods12132551 (PMC10340153; doi:10.3390/foods12132551)
Supplement: Supplementary file 1 [file foods-12-02551-s001.zip › Supplementary Table S3_Borrelli et al_R1.xlsx]

## Sheet: Foglio1
Table S3. Pairwaise significant correlations between antioxidant activities and phenolic compounds
Variable	by Variable	Correlation	Signif Prob	Plot Corr
DPPH	TPC	0.9838	<.0001	++++++++++++
TEAC	TPC	0.9754	<.0001	++++++++++++
DPPH	TFC	0.996	<.0001	++++++++++++
TEAC	TFC	0.9923	<.0001	++++++++++++
DPPH	TPAC	0.9789	<.0001	++++++++++++
TEAC	TPAC	0.9849	<.0001	++++++++++++
DPPH	Caffeic acid	0.7355	0.0064	+++++++++
TEAC	Caffeic acid	0.7273	0.0073	+++++++++
DPPH	Syringic acid	0.7039	0.0106	+++++++++
TEAC	Syringic acid	0.6936	0.0124	+++++++++
DPPH	p-Coumaric acid	0.7518	0.0048	+++++++++
TEAC	p-Coumaric acid	0.7616	0.004	++++++++++
DPPH	Ferulic acid	0.56	0.04	-----------
TEAC	Ferulic acid	0.596	0.0508	+++++++
DPPH	Sinapic acid	-0.8391	0.0006	++++++++++++
TEAC	Sinapic acid	-0.8629	0.0003	++++++++++++
DPPH	trans-Cinnamic acid	0.5942	0.0416	+++++++
TEAC	trans-Cinnamic acid	0.6138	0.0337	++++++++
DPPH	Catechin	0.9683	<.0001	++++++++++++
TEAC	Catechin	0.9708	<.0001	++++++++++++
