# Supplementary material for: Antioxidants and Phenolic Acid Composition of Wholemeal and Refined-Flour, and Related Biscuits in Old and Modern Cultivars Belonging to Three Cereal Species
Source: Foods. 2023 Jun 29;12(13):2551. doi: 10.3390/foods12132551 (PMC10340153; doi:10.3390/foods12132551)
Supplement: Supplementary file 1 [file foods-12-02551-s001.zip › Supplementary Table S4_Borrelli et al_R1.xlsx]

## Sheet: S4
Supplementary Table S4 Soluble free, soluble conjugated and insoluble bound phenolic acids in the refined-flours of the two genotype of three species analysed in two crop years. Values are means± standard deviation (SD) of three independent evaluation
		Triticum turgidum L. spp. dicoccum Shrank												T. turgidum ssp. durum													Hordeum vulgare
		MOLISANO (old)					PADRE PIO (modern)							CAPPELLI (old)					FORTORE (modern)								L94 (old)					PRIORA (modern)
		Concentration (µg/g, DW)					Concentration (µg/g, DW)							Concentration (µg/g, DW)					Concentration (µg/g, DW)								Concentration (µg/g, DW)					Concentration (µg/g, DW)
		2016		2017			2016		2017					2016		2017			2016		2017						2016		2017			2016		2017
		Mean value	SD	Mean value	SD		Mean value	SD	Mean value	SD				Mean value	SD	Mean value	SD		Mean value	SD	Mean value	SD					Mean value	SD	Mean value	SD		Mean value	SD	Mean value	SD
	Soluble free												Soluble free													Soluble free
PHENOLIC ACIDS	Protocatechuic acid	n.d.	n.d.	n.d.	n.d.		n.d.	n.d.	n.d.	n.d.		PHENOLIC ACIDS	Protocatechuic acid	n.d.	n.d.	n.d.	n.d.		n.d.	n.d.	n.d.	n.d.			PHENOLIC ACIDS	Protocatechuic acid	n.d.	n.d.	n.d.	n.d.		n.d.	n.d.	n.d.	n.d.
	p -Hydroxybenz acid	n.d.	n.d.	n.d.	n.d.		n.d.	n.d.	n.d.	n.d.			p -Hydroxybenz acid	n.d.	n.d.	n.d.	n.d.		n.d.	n.d.	n.d.	n.d.				p -Hydroxybenz acid	n.d.	n.d.	n.d.	n.d.		n.d.	n.d.	n.d.	n.d.
	Caffeic acid	n.d.	n.d.	n.d.	n.d.		n.d.	n.d.	n.d.	n.d.			Caffeic acid	n.d.	n.d.	n.d.	n.d.		n.d.	n.d.	n.d.	n.d.				Caffeic acid	n.d.	n.d.	n.d.	n.d.		n.d.	n.d.	n.d.	n.d.
	Syringic acid	n.d.	n.d.	n.d.	n.d.		n.d.	n.d.	n.d.	n.d.			Syringic acid	n.d.	n.d.	n.d.	n.d.		n.d.	n.d.	n.d.	n.d.				Syringic acid	1.99	0.41	1.79	0.48		1.1	0.12	1.2	0.4
	Vanillin	n.d.	n.d.	n.d.	n.d.		n.d.	n.d.	n.d.	n.d.			Vanillin	0.69	0.05	0.66	0.02		0.63	0.06	0.61	0.04				Vanillin	0.19	0.09	0.22	0.04		0.13	0.02	0.26	0.07
	p-Coumaric acid	n.d.	n.d.	n.d.	n.d.		n.d.	n.d.	n.d.	n.d.			p-Coumaric acid	n.d.	n.d.	n.d.	n.d.		n.d.	n.d.	n.d.	n.d.				p-Coumaric acid	1.09	0.022	0.93	0.021		0.75	0.03	0.74	0.013
	Syringaldeide	n.d.	n.d.	n.d.	n.d.		n.d.	n.d.	n.d.	n.d.			Syringaldeide	n.d.	n.d.	n.d.	n.d.		n.d.	n.d.	n.d.	n.d.				Syringaldeide	n.d.	n.d.	n.d.	n.d.		n.d.	n.d.	n.d.	n.d.
	Ferulic acid	1.2	0.018	0.71	0.017		0.6	0.02	0.75	0.015			Ferulic acid	0.73	0.02	0.57	0.08		0.59	0.05	0.34	0.011				Ferulic acid	1.43	0.1	1.37	0.11		1.5	0.06	1.71	0.26
	Sinapic acid	n.d.	n.d.	n.d.	n.d.		n.d.	n.d.	n.d.	n.d.			Sinapic acid	n.d.	n.d.	n.d.	n.d.		n.d.	n.d.	n.d.	n.d.				Sinapic acid	n.d.	n.d.	n.d.	n.d.		n.d.	n.d.	n.d.	n.d.
	trans-cinnamic acid	n.d.	n.d.	n.d.	n.d.		n.d.	n.d.	n.d.	n.d.			trans-cinnamic acid	n.d.	n.d.	n.d.	n.d.		n.d.	n.d.	n.d.	n.d.				trans-cinnamic acid	n.d.	n.d.	n.d.	n.d.		n.d.	n.d.	n.d.	n.d.
	cis-cinnamic acid	n.d.	n.d.	n.d.	n.d.		n.d.	n.d.	n.d.	n.d.			cis-cinnamic acid	n.d.	n.d.	n.d.	n.d.		n.d.	n.d.	n.d.	n.d.				cis-cinnamic acid	n.d.	n.d.	n.d.	n.d.		n.d.	n.d.	n.d.	n.d.
	Vanillic acid	n.d.	n.d.	n.d.	n.d.		n.d.	n.d.	n.d.	n.d.			Vanillic acid	n.d.	n.d.	n.d.	n.d.		n.d.	n.d.	n.d.	n.d.				Vanillic acid	n.d.	n.d.	n.d.	n.d.		n.d.	n.d.	n.d.	n.d.
	Sum Soluble free	1.2		0.71			0.6		0.75				Sum Soluble free	1.42		1.23			1.22		0.95					Sum Soluble free	4.7		4.31			3.48		3.91
FLAVONOIDS	Catechin	n.d.	n.d.	n.d.	n.d.		n.d.	n.d.	n.d.	n.d.		FLAVONOIDS	Catechin	n.d.	n.d.	n.d.	n.d.		n.d.	n.d.	n.d.	n.d.			FLAVONOIDS	Catechin	n.d.	n.d.	n.d.	n.d.		n.d.	n.d.	n.d.	n.d.
	quercetin	n.d.	n.d.	n.d.	n.d.		n.d.	n.d.	n.d.	n.d.			quercetin	n.d.	n.d.	n.d.	n.d.		n.d.	n.d.	n.d.	n.d.				quercetin	n.d.	n.d.	n.d.	n.d.		n.d.	n.d.	n.d.	n.d.
	Narigenin	n.d.	n.d.	n.d.	n.d.		n.d.	n.d.	n.d.	n.d.			Narigenin	n.d.	n.d.	n.d.	n.d.		n.d.	n.d.	n.d.	n.d.				Narigenin	n.d.	n.d.	n.d.	n.d.		n.d.	n.d.	n.d.	n.d.
	Sum Soluble free	0		0			0		0				Sum Soluble free	0		0			0		0					Sum Soluble free	0		0			0		0
		Triticum turgidum L. spp. dicoccum Shrank												T. turgidum ssp. durum													Hordeum vulgare
		MOLISANO (old)					PADRE PIO (modern)							CAPPELLI (old)					FORTORE (modern)								L94 (old)					PRIORA (modern)
		Concentration (µg/g, DW)					Concentration (µg/g, DW)							Concentration (µg/g, DW)					Concentration (µg/g, DW)								Concentration (µg/g, DW)					Concentration (µg/g, DW)
		2016		2017			2016		2017					2016		2017			2016		2017						2016		2017			2016		2017
		Mean value	SD	Mean value	SD		Mean value	SD	Mean value	SD				Mean value	SD	Mean value	SD		Mean value	SD	Mean value	SD					Mean value	SD	Mean value	SD		Mean value	SD	Mean value	SD
	Soluble conjugated												Soluble conjugated													Soluble conjugated
PHENOLIC ACIDS	Protocatechuic acid	n.d.	n.d.	n.d.	n.d.		n.d.	n.d.	n.d.	n.d.		PHENOLIC ACIDS	Protocatechuic acid	n.d.	n.d.	n.d.	n.d.		n.d.	n.d.	n.d.	n.d.			PHENOLIC ACIDS	Protocatechuic acid	n.d.	n.d.	n.d.	n.d.		n.d.	n.d.	n.d.	n.d.
	p -Hydroxybenz acid	n.d.	n.d.	n.d.	n.d.		n.d.	n.d.	n.d.	n.d.			p -Hydroxybenz acid	n.d.	n.d.	n.d.	n.d.		n.d.	n.d.	n.d.	n.d.				p -Hydroxybenz acid	n.d.	n.d.	n.d.	n.d.		n.d.	n.d.	n.d.	n.d.
	Caffeic acid	n.d.	n.d.	n.d.	n.d.		n.d.	n.d.	n.d.	n.d.			Caffeic acid	n.d.	n.d.	n.d.	n.d.		n.d.	n.d.	n.d.	n.d.				Caffeic acid	n.d.	n.d.	n.d.	n.d.		n.d.	n.d.	n.d.	n.d.
	Syringic acid	n.d.	n.d.	n.d.	n.d.		n.d.	n.d.	n.d.	n.d.			Syringic acid	n.d.	n.d.	n.d.	n.d.		n.d.	n.d.	n.d.	n.d.				Syringic acid	0.63	0.03	0.72	0.05		0.75	0.09	0.54	0.05
	Vanillin	0.92	0.05	0.96	0.07		1.02	0.13	0.92	0.1			Vanillin	0.37	0.07	0.56	0.07		0.41	0.03	0.31	0.04				Vanillin	0.56	0.08	0.67	0.05		0.64	0.03	0.64	0.08
	p-Coumaric acid	0.27	0.03	0.29	0.07		0.3	0.05	0.27	0.08			p-Coumaric acid	0.2	0.01	0.21	0.05		0.29	0.02	0.13	0.03				p-Coumaric acid	0.46	0.04	0.53	0.05		0.59	0.04	0.71	0.1
	Syringaldeide	n.d.	n.d.	n.d.	n.d.		n.d.	n.d.	n.d.	n.d.			Syringaldeide	n.d.	n.d.	n.d.	n.d.		n.d.	n.d.	n.d.	n.d.				Syringaldeide	n.d.	n.d.	n.d.	n.d.		n.d.	n.d.	n.d.	n.d.
	Ferulic acid	3.22	0.21	3.25	0.12		5.05	0.74	3.62	0.44			Ferulic acid	3.88	0.22	1.44	0.27		2.94	0.23	2.95	0.28				Ferulic acid	5.08	0.47	5.3	0.18		4.88	0.14	6.98	0.12
	Sinapic acid	n.d.	n.d.	n.d.	n.d.		n.d.	n.d.	n.d.	n.d.			Sinapic acid	n.d.	n.d.	n.d.	n.d.		n.d.	n.d.	n.d.	n.d.				Sinapic acid	n.d.	n.d.	n.d.	n.d.		n.d.	n.d.	n.d.	n.d.
	trans-cinnamic acid	n.d.	n.d.	n.d.	n.d.		n.d.	n.d.	n.d.	n.d.			trans-cinnamic acid	n.d.	n.d.	n.d.	n.d.		n.d.	n.d.	n.d.	n.d.				trans-cinnamic acid	n.d.	n.d.	n.d.	n.d.		n.d.	n.d.	n.d.	n.d.
	cis-cinnamic acid	n.d.	n.d.	n.d.	n.d.		n.d.	n.d.	n.d.	n.d.			cis-cinnamic acid	n.d.	n.d.	n.d.	n.d.		n.d.	n.d.	n.d.	n.d.				cis-cinnamic acid	n.d.	n.d.	n.d.	n.d.		n.d.	n.d.	n.d.	n.d.
	Vanillic acid	n.d.	n.d.	n.d.	n.d.		n.d.	n.d.	n.d.	n.d.			Vanillic acid	1.31	0.1	2.47	0.2		1.37	0.13	1.17	0.08				Vanillic acid	1.12	0.09	1.39	0.09		1.09	0.14	1.44	0.17
	Sum Soluble cmnjugated	4.41		4.5			6.37		4.81				Sum Soluble cmnjugated	5.76		4.68			5.01		4.56					Sum Soluble cmnjugated	7.85		8.61			7.95		10.31
FLAVONOIDS	Catechin	n.d.	n.d.	n.d.	n.d.		n.d.	n.d.	n.d.	n.d.		FLAVONOIDS	Catechin	n.d.	n.d.	n.d.	n.d.		n.d.	n.d.	n.d.	n.d.			FLAVONOIDS	Catechin	n.d.	n.d.	n.d.	n.d.		n.d.	n.d.	n.d.	n.d.
	quercetin	n.d.	n.d.	n.d.	n.d.		n.d.	n.d.	n.d.	n.d.			quercetin	n.d.	n.d.	n.d.	n.d.		n.d.	n.d.	n.d.	n.d.				quercetin	n.d.	n.d.	n.d.	n.d.		n.d.	n.d.	n.d.	n.d.
	Narigenin	n.d.	n.d.	n.d.	n.d.		n.d.	n.d.	n.d.	n.d.			Narigenin	n.d.	n.d.	n.d.	n.d.		n.d.	n.d.	n.d.	n.d.				Narigenin	n.d.	n.d.	n.d.	n.d.		n.d.	n.d.	n.d.	n.d.
	Sum Soluble cmnjugated	0		0			0		0				Sum Soluble cmnjugated	0		0			0		0					Sum Soluble cmnjugated	0		0			0		0
		Triticum turgidum L. spp. dicoccum Shrank												T. turgidum ssp. durum													Hordeum vulgare
		MOLISANO (old)					PADRE PIO (modern)							CAPPELLI (old)					FORTORE (modern)								L94 (old)					PRIORA (modern)
		Concentration (µg/g, DW)					Concentration (µg/g, DW)							Concentration (µg/g, DW)					Concentration (µg/g, DW)								Concentration (µg/g, DW)					Concentration (µg/g, DW)
		2016		2017			2016		2017					2016		2017			2016		2017						2016		2017			2016		2017
		Mean value	SD	Mean value	SD		Mean value	SD	Mean value	SD				Mean value	SD	Mean value	SD		Mean value	SD	Mean value	SD					Mean value	SD	Mean value	SD		Mean value	SD	Mean value	SD
	Insoluble bound												Insoluble bound													Insoluble bound
PHENOLIC ACIDS	Protocatechuic acid	n.d.	n.d.	n.d.	n.d.		n.d.	n.d.	n.d.	n.d.		PHENOLIC ACIDS	Protocatechuic acid	n.d.	n.d.	n.d.	n.d.		n.d.	n.d.	n.d.	n.d.			PHENOLIC ACIDS	Protocatechuic acid	0.77	0.21	0.79	0.11		0.5	0.01	0.62	0.11
	p -Hydroxybenz acid	n.d.	n.d.	n.d.	n.d.		n.d.	n.d.	n.d.	n.d.			p -Hydroxybenz acid	n.d.	n.d.	n.d.	n.d.		n.d.	n.d.	n.d.	n.d.				p -Hydroxybenz acid	1.23	0.19	0.68	0.05		0.65	0.09	0.82	0.06
	Caffeic acid	n.d.	n.d.	n.d.	n.d.		n.d.	n.d.	n.d.	n.d.			Caffeic acid	n.d.	n.d.	n.d.	n.d.		n.d.	n.d.	n.d.	n.d.				Caffeic acid	3.03	0.43	2.03	0.27		2.75	0.22	2.93	0.18
	Syringic acid	n.d.	n.d.	n.d.	n.d.		n.d.	n.d.	n.d.	n.d.			Syringic acid	n.d.	n.d.	n.d.	n.d.		n.d.	n.d.	n.d.	n.d.				Syringic acid	n.d.	n.d.	n.d.	n.d.		n.d.	n.d.	n.d.	n.d.
	Vanillin	0.83	0.06	0.52	0.04		0.8	0.08	0.55	0.06			Vanillin	0.35	0.03	0.69	0.06		0.36	0.07	0.33	0.07				Vanillin	0.96	0.12	0.9	0.16		0.5	0.06	0.69	0.04
	p-Coumaric acid	2.96	0.36	3.4	0.38		2.28	0.25	2.26	0.11			p-Coumaric acid	1.81	0.16	2.14	0.24		1.87	0.16	2.12	0.09				p-Coumaric acid	3.14	0.74	4.04	0.48		3.29	0.45	3.95	0.66
	Syringaldeide	n.d.	n.d.	n.d.	n.d.		n.d.	n.d.	n.d.	n.d.			Syringaldeide	n.d.	n.d.	n.d.	n.d.		n.d.	n.d.	n.d.	n.d.				Syringaldeide	n.d.	n.d.	n.d.	n.d.		n.d.	n.d.	n.d.	n.d.
	Ferulic acid	78.83	3.86	78.97	3.77		118.96	5.53	97.66	8.71			Ferulic acid	97.74	5.81	72.56	2.52		77.54	5.64	73.07	4.91				Ferulic acid	121.8	16.38	142.09	19.1		113.86	5.08	138	4.9
	Sinapic acid	2.03	0.51	2.31	0.26		2.97	0.45	2.08	0.27			Sinapic acid	1.58	0.05	1.47	0.08		1.72	0.27	1.28	0.04				Sinapic acid	3.52	0.73	3.73	0.61		1.89	0.16	2.52	0.19
	trans-cinnamic acid	2.62	0.71	1.85	0.58		n.d.	n.d.	n.d.	n.d.			trans-cinnamic acid	n.d.	n.d.	n.d.	n.d.		2.06	0.79	0.64	0.15				trans-cinnamic acid	8	0.55	8.31	1.03		5.39	0.38	3.43	0.15
	cis-cinnamic acid	n.d.	n.d.	n.d.	n.d.		n.d.	n.d.	n.d.	n.d.			cis-cinnamic acid	n.d.	n.d.	n.d.	n.d.		n.d.	n.d.	n.d.	n.d.				cis-cinnamic acid	n.d.	n.d.	n.d.	n.d.		n.d.	n.d.	n.d.	n.d.
	Vanillic acid	0.19	0.05	0.19	0.02		0.31	0.05	0.18	0.03			Vanillic acid	0.17	0.02	0.26	0.03		0.15	0.03	0.26	0.04				Vanillic acid	0.34	0.02	0.52	0.07		0.22	0.04	0.61	0.06
	Sum Insoluble bound	87.46		87.24			125.32		102.73				Sum Insoluble bound	101.65		77.12			83.7		77.7					Sum Insoluble bound	142.79		163.09			129.05		153.57
FLAVONOIDS	Catechin	n.d.	n.d.	n.d.	n.d.		n.d.	n.d.	n.d.	n.d.		FLAVONOIDS	Catechin	n.d.	n.d.	n.d.	n.d.		n.d.	n.d.	n.d.	n.d.			FLAVONOIDS	Catechin	2.32	0.55	2.07	0.47		2.26	0.44	2.72	0.31
	quercetin	n.d.	n.d.	n.d.	n.d.		n.d.	n.d.	n.d.	n.d.			quercetin	n.d.	n.d.	n.d.	n.d.		n.d.	n.d.	n.d.	n.d.				quercetin	n.d.	n.d.	n.d.	n.d.		n.d.	n.d.	n.d.	n.d.
	Narigenin	n.d.	n.d.	n.d.	n.d.		n.d.	n.d.	n.d.	n.d.			Narigenin	n.d.	n.d.	n.d.	n.d.		n.d.	n.d.	n.d.	n.d.				Narigenin	n.d.	n.d.	n.d.	n.d.		n.d.	n.d.	n.d.	n.d.
	Sum Insoluble bound	0		0			0		0				Sum Insoluble bound	0		0			0		0					Sum Insoluble bound	2.32		2.07			2.26		2.72
