# Supplementary material for: Antioxidants and Phenolic Acid Composition of Wholemeal and Refined-Flour, and Related Biscuits in Old and Modern Cultivars Belonging to Three Cereal Species
Source: Foods. 2023 Jun 29;12(13):2551. doi: 10.3390/foods12132551 (PMC10340153; doi:10.3390/foods12132551)
Supplement: Supplementary file 1 [file foods-12-02551-s001.zip › Supplementary Table S6_Borrelli et al_R1.xlsx]

## Sheet: wholemeal1
Supplementary Table S6a. Total polyphenols (TPC), flavonoids (TFC), proanthocyanidins (TPAC), carotenoids (TYPC) and antioxidant activities (DPPH and TEAC) in the wholemeal of three species and a commercial CTRL. Values are means± standard deviation (SD) of three independent evaluation
Species	Genotype	Type	TPC (µg GAE g-1)	TFC (µg CE g-1)	TPAC (µg CE g-1)	TYPC (µg g-1)	DPPH (µmol TE g-1)	TEAC (µmol TE g-1)
T. turgidum ssp. durum	Fortore	Modern	1060.37±0.21	220.50±0.71	75.82±0.05	5.98±0.01	2.14±0.03	2.83±0.01
T. turgidum ssp. dicoccum	Molisano	Old	1042.32±2.65	220.00±5.66	108.50±0.02	4.59±0.01	2.22±0.07	3.01±0.03
Hordeum vulgare L.	L94	Old	2361.04±14.46	676±5.66	673.86±41.59	7.60±0.03	5.80±0.02	7.11±0.04
Triticum aestivum	Commercial CTRL	//	596.70±9.86	150.02±2.68	20.05±0.04	2.11±0.02	1.00±0.14	1.32±0.18

## Sheet: wholemeal2
Supplementary Table S6b. Soluble free, soluble conjugated and insoluble bound phenolic acids in the wholemeal of three species and a commercial CTRL. Values are means± standard deviation (SD) of three independent evaluation
		Triticum turgidum L. spp. dicoccum Shrank												T. turgidum ssp. durum													Hordeum vulgare																Triticum aestivum
		MOLISANO (old)												FORTORE (modern)													L94 (old)																Commercial CTRL
		Concentration (µg/g, DW)												Concentration (µg/g, DW)													Concentration (µg/g, DW)																Concentration (µg/g, DW)
		2016		2017										2016		2017											2016		2017														2016		2017
		Mean value	SD	Mean value	SD									Mean value	SD	Mean value	SD										Mean value	SD	Mean value	SD													Mean value	SD	Mean value	SD
	Soluble free												Soluble free													Soluble free																Soluble free
PHENOLIC ACIDS	Protocatechuic acid	n.d.	n.d.	n.d.	n.d.							PHENOLIC ACIDS	Protocatechuic acid	n.d.	n.d.	n.d.	n.d.								PHENOLIC ACIDS	Protocatechuic acid	n.d.	n.d.	n.d.	n.d.											PHENOLIC ACIDS	Protocatechuic acid	n.d.	n.d.	n.d.	n.d.
	p -Hydroxybenz acid	n.d.	n.d.	n.d.	n.d.								p -Hydroxybenz acid	n.d.	n.d.	n.d.	n.d.									p -Hydroxybenz acid	n.d.	n.d.	n.d.	n.d.												p -Hydroxybenz acid	n.d.	n.d.	n.d.	n.d.
	Caffeic acid	n.d.	n.d.	n.d.	n.d.								Caffeic acid	n.d.	n.d.	n.d.	n.d.									Caffeic acid	n.d.	n.d.	n.d.	n.d.												Caffeic acid	n.d.	n.d.	n.d.	n.d.
	Syringic acid	n.d.	n.d.	n.d.	n.d.								Syringic acid	n.d.	n.d.	n.d.	n.d.									Syringic acid	n.d.	n.d.	n.d.	n.d.												Syringic acid	n.d.	n.d.	n.d.	n.d.
	Vanillin	2.24	0.05	2.32	0.02								Vanillin	1.44	0.25	1.52	0.3									Vanillin	n.d.	n.d.	n.d.	n.d.												Vanillin	2.88	0.15	3	0.18
	p-Coumaric acid	n.d.	n.d.	n.d.	n.d.								p-Coumaric acid	n.d.	n.d.	n.d.	n.d.									p-Coumaric acid	n.d.	n.d.	n.d.	n.d.												p-Coumaric acid	n.d.	n.d.	n.d.	n.d.
	Syringaldeide	n.d.	n.d.	n.d.	n.d.								Syringaldeide	n.d.	n.d.	n.d.	n.d.									Syringaldeide	n.d.	n.d.	n.d.	n.d.												Syringaldeide	n.d.	n.d.	n.d.	n.d.
	Ferulic acid	5.52	0.55	5.04	0.7								Ferulic acid	4.48	0.14	4.8	0.18									Ferulic acid	3.68	0.41	3.66	0.39												Ferulic acid	1.44	0.28	1.76	0.39
	Sinapic acid	n.d.	n.d.	n.d.	n.d.								Sinapic acid	n.d.	n.d.	n.d.	n.d.									Sinapic acid	n.d.	n.d.	n.d.	n.d.												Sinapic acid	n.d.	n.d.	n.d.	n.d.
	trans-cinnamic acid	n.d.	n.d.	n.d.	n.d.								trans-cinnamic acid	n.d.	n.d.	n.d.	n.d.									trans-cinnamic acid	n.d.	n.d.	n.d.	n.d.												trans-cinnamic acid	n.d.	n.d.	n.d.	n.d.
	cis-cinnamic acid	n.d.	n.d.	n.d.	n.d.								cis-cinnamic acid	n.d.	n.d.	n.d.	n.d.									cis-cinnamic acid	n.d.	n.d.	n.d.	n.d.												cis-cinnamic acid	n.d.	n.d.	n.d.	n.d.
	Vanillic acid	1.84	0.78	1.76	0.84								Vanillic acid	1.44	0.56	1.44	0.62									Vanillic acid	n.d.	n.d.	n.d.	n.d.												Vanillic acid	n.d.	n.d.	n.d.	n.d.
	Sum Soluble free	9.6		9.12									Sum Soluble free	5.92		6.32										Sum Soluble free	3.68		3.66													Sum Soluble free	4.32		4.76
FLAVONOIDS	Catechin	n.d.	n.d.	n.d.	n.d.							FLAVONOIDS	Catechin	n.d.	n.d.	n.d.	n.d.								FLAVONOIDS	Catechin	29.12	1.18	31.12	1.24											FLAVONOIDS	Catechin	n.d.	n.d.	n.d.	n.d.
	quercetin	n.d.	n.d.	n.d.	n.d.								quercetin	n.d.	n.d.	n.d.	n.d.									quercetin	n.d.	n.d.	n.d.	n.d.												quercetin	n.d.	n.d.	n.d.	n.d.
	Narigenin	n.d.	n.d.	n.d.	n.d.								Narigenin	n.d.	n.d.	n.d.	n.d.									Narigenin	n.d.	n.d.	n.d.	n.d.												Narigenin	n.d.	n.d.	n.d.	n.d.
	Sum Soluble free	0		0									Sum Soluble free	0		0										Sum Soluble free	29.12		31.12													Sum Soluble free	0		0
		Triticum turgidum L. spp. dicoccum Shrank												T. turgidum ssp. durum													Hordeum vulgare																Triticum aestivum
		MOLISANO (old)												FORTORE (modern)													L94 (old)																Commercial CTRL
		Concentration (µg/g, DW)												Concentration (µg/g, DW)													Concentration (µg/g, DW)																Concentration (µg/g, DW)
		2016		2017										2016		2017											2016		2017														2016		2017
		Mean value	SD	Mean value	SD									Mean value	SD	Mean value	SD										Mean value	SD	Mean value	SD													Mean value	SD	Mean value	SD
	Soluble conjugated												Soluble conjugated													Soluble conjugated																Soluble conjugated
PHENOLIC ACIDS	Protocatechuic acid	n.d.	n.d.	n.d.	n.d.							PHENOLIC ACIDS	Protocatechuic acid	n.d.	n.d.	n.d.	n.d.								PHENOLIC ACIDS	Protocatechuic acid	n.d.	n.d.	n.d.	n.d.											PHENOLIC ACIDS	Protocatechuic acid	n.d.	n.d.	n.d.	n.d.
	p -Hydroxybenz acid	2.03	0.78	2.51	0.7								p -Hydroxybenz acid	2.03	0.25	2.51	0.32									p -Hydroxybenz acid	1.39	0.88	1.33	0.78												p -Hydroxybenz acid	n.d.	n.d.	n.d.	n.d.
	Caffeic acid	n.d.	n.d.	n.d.	n.d.								Caffeic acid	n.d.	n.d.	n.d.	n.d.									Caffeic acid	n.d.	n.d.	n.d.	n.d.												Caffeic acid	n.d.	n.d.	n.d.	n.d.
	Syringic acid	n.d.	n.d.	n.d.	n.d.								Syringic acid	2.13	0.15	2.45	0.19									Syringic acid	1.28	0.45	1.76	0.49												Syringic acid	n.d.	n.d.	n.d.	n.d.
	Vanillin	1.23	0.25	1.12	0.3								Vanillin	0.85	0.05	1.39	0.09									Vanillin	1.55	0.56	1.6	0.65												Vanillin	0.69	0.056	0.53	0.065
	p-Coumaric acid	1.92	0.45	1.71	0.48								p-Coumaric acid	1.87	0.26	1.71	0.32									p-Coumaric acid	1.44	0.48	1.49	0.51												p-Coumaric acid	n.d.	n.d.	n.d.	n.d.
	Syringaldeide	n.d.	n.d.	n.d.	n.d.								Syringaldeide	n.d.	n.d.	n.d.	n.d.									Syringaldeide	n.d.	n.d.	n.d.	n.d.												Syringaldeide	0.59	0.25	0.69	0.28
	Ferulic acid	15.89	2.5	14.83	2.48								Ferulic acid	16.11	1.45	15.09	1.89									Ferulic acid	18.19	1.26	17.81	1.36												Ferulic acid	1.12	0.12	0.91	0.14
	Sinapic acid	10.23	2.35	10.15	2.44								Sinapic acid	27.07	1.88	25.6	1.77									Sinapic acid	15.95	1.3	15.04	1.35												Sinapic acid	0.59	0.03	0.69	0.05
	trans-cinnamic acid	n.d.	n.d.	n.d.	n.d.								trans-cinnamic acid	n.d.	n.d.	n.d.	n.d.									trans-cinnamic acid	n.d.	n.d.	n.d.	n.d.												trans-cinnamic acid	n.d.	n.d.	n.d.	n.d.
	cis-cinnamic acid	n.d.	n.d.	n.d.	n.d.								cis-cinnamic acid	n.d.	n.d.	n.d.	n.d.									cis-cinnamic acid	n.d.	n.d.	n.d.	n.d.												cis-cinnamic acid	n.d.	n.d.	n.d.	n.d.
	Vanillic acid	3.2	0.26	2.67	0.28								Vanillic acid	4.21	0.23	5.39	0.18									Vanillic acid	4.27	0.26	3.73	0.46												Vanillic acid	n.d.	n.d.	n.d.	n.d.
	Sum Soluble cmnjugated	34.5		32.99									Sum Soluble cmnjugated	54.27		54.14										Sum Soluble cmnjugated	44.07		42.76													Sum Soluble cmnjugated	2.99		2.82
FLAVONOIDS	Catechin	n.d.	n.d.	n.d.	n.d.							FLAVONOIDS	Catechin	n.d.	n.d.	n.d.	n.d.								FLAVONOIDS	Catechin	2.61	0.25	3.09	0.29											FLAVONOIDS	Catechin	n.d.	n.d.	n.d.	n.d.
	quercetin	n.d.	n.d.	n.d.	n.d.								quercetin	n.d.	n.d.	n.d.	n.d.									quercetin	n.d.	n.d.	n.d.	n.d.												quercetin	n.d.	n.d.	n.d.	n.d.
	Narigenin	n.d.	n.d.	n.d.	n.d.								Narigenin	n.d.	n.d.	n.d.	n.d.									Narigenin	n.d.	n.d.	n.d.	n.d.												Narigenin	n.d.	n.d.	n.d.	n.d.
	Sum Soluble cmnjugated	0		0									Sum Soluble cmnjugated	0		0										Sum Soluble cmnjugated	2.61		3.09													Sum Soluble cmnjugated	0		0
		Triticum turgidum L. spp. dicoccum Shrank												T. turgidum ssp. durum													Hordeum vulgare																Triticum aestivum
		MOLISANO (old)												FORTORE (modern)													L94 (old)																Commercial CTRL
		Concentration (µg/g, DW)												Concentration (µg/g, DW)													Concentration (µg/g, DW)																Concentration (µg/g, DW)
		2016		2017										2016		2017											2016		2017														2016		2017
		Mean value	SD	Mean value	SD									Mean value	SD	Mean value	SD										Mean value	SD	Mean value	SD													Mean value	SD	Mean value	SD
	Insoluble bound												Insoluble bound													Insoluble bound																Insoluble bound
PHENOLIC ACIDS	Protocatechuic acid											PHENOLIC ACIDS	Protocatechuic acid	n.d.	n.d.	n.d.	n.d.								PHENOLIC ACIDS	Protocatechuic acid	n.d.	n.d.	n.d.	n.d.											PHENOLIC ACIDS	Protocatechuic acid	n.d.	n.d.	n.d.	n.d.
	p -Hydroxybenz acid	1.44	0.66	1.25	0.52								p -Hydroxybenz acid	1.63	0.78	1.57	0.65									p -Hydroxybenz acid	4.03	0.78	4.24	0.84												p -Hydroxybenz acid	n.d.	n.d.	n.d.	n.d.
	Caffeic acid	3.17	0.8	2.61	0.75								Caffeic acid	0.75	0.15	0.8	0.19									Caffeic acid	2.64	0.5	2.85	0.57												Caffeic acid	n.d.	n.d.	n.d.	n.d.
	Syringic acid	1.57	0.26	1.25	0.15								Syringic acid	3.28	0.26	3.44	0.28									Syringic acid	2.96	0.52	2.88	0.45												Syringic acid	1.6	0.49	1.47	0.48
	Vanillin	2.59	0.56	1.97	0.65								Vanillin	2.93	0.25	3.17	0.26									Vanillin	3.25	0.78	4.45	0.87												Vanillin	n.d.	n.d.	n.d.	n.d.
	p-Coumaric acid	36.59	2.58	34.64	2.89								p-Coumaric acid	19.65	2.25	19.31	2.35									p-Coumaric acid	21.79	1.26	23.87	1.35												p-Coumaric acid	0.35	0.026	0.29	0.035
	Syringaldeide	6.72	0.98	6.83	0.99								Syringaldeide	5.36	0.78	5.81	0.84									Syringaldeide	5.92	0.56	6.4	0.46												Syringaldeide	n.d.	n.d.	n.d.	n.d.
	Ferulic acid	580.83	4.89	555.33	5.26								Ferulic acid	615.81	3.25	666.29	3.65									Ferulic acid	623.09	5.26	664.45	5.87												Ferulic acid	18.75	1.26	18	1.87
	Sinapic acid	16.43	1.26	16.59	1.36								Sinapic acid	15.01	1.25	15.25	1.36									Sinapic acid	19.84	1.63	21.28	1.45												Sinapic acid	0.4	0.026	0.32	0.045
	trans-cinnamic acid	n.d.	n.d.	n.d.	n.d.								trans-cinnamic acid	n.d.	n.d.	n.d.	n.d.									trans-cinnamic acid	n.d.	n.d.	n.d.	n.d.												trans-cinnamic acid	n.d.	n.d.	n.d.	n.d.
	cis-cinnamic acid	n.d.	n.d.	n.d.	n.d.								cis-cinnamic acid	n.d.	n.d.	n.d.	n.d.									cis-cinnamic acid	n.d.	n.d.	n.d.	n.d.												cis-cinnamic acid	n.d.	n.d.	n.d.	n.d.
	Vanillic acid	2.59	0.26	1.97	0.16								Vanillic acid	2.93	0.75	3.17	0.82									Vanillic acid	10.56	1	11.52	0.98												Vanillic acid	n.d.	n.d.	n.d.	n.d.
	Sum Insoluble bound	650.49		621.19									Sum Insoluble bound	667.35		718.81										Sum Insoluble bound	694.08		741.94													Sum Insoluble bound	21.1		20.08
FLAVONOIDS	Catechin	n.d.	n.d.	n.d.	n.d.							FLAVONOIDS	Catechin	n.d.	n.d.	n.d.	n.d.								FLAVONOIDS	Catechin	n.d.	n.d.	n.d.	n.d.											FLAVONOIDS	Catechin	n.d.	n.d.	n.d.	n.d.
	quercetin	n.d.	n.d.	n.d.	n.d.								quercetin	n.d.	n.d.	n.d.	n.d.									quercetin	n.d.	n.d.	n.d.	n.d.												quercetin	n.d.	n.d.	n.d.	n.d.
	Narigenin	n.d.	n.d.	n.d.	n.d.								Narigenin	n.d.	n.d.	n.d.	n.d.									Narigenin	n.d.	n.d.	n.d.	n.d.												Narigenin	n.d.	n.d.	n.d.	n.d.
	Sum Insoluble bound	0		0									Sum Insoluble bound	0		0										Sum Insoluble bound	0		0													Sum Insoluble bound	0		0
